# Supplementary material for: The Repertoire of Minimal Mobile Elements in the Neisseria Species and Evidence That These Are Involved in Horizontal Gene Transfer in Other Bacteria
Source: Oxford University Press journal article supplement (doi:10.1093/molbev/msm215), 2007-06-29
Supplement: msm215_Supplementary_Data.zip [file msm215_Supplementary_Data.zip]

Archive with 5 entries (5 files):
- mbe-07-0447-File012_msm215.pdf
- mbe-07-0447-File015_msm215.pdf
- mbe-07-0447-File013_msm215.pdf
- mbe-07-0447-File014_msm215.pdf
- mbe-07-0447-File011_msm215.pdf
