# Supplementary material for: The Repertoire of Minimal Mobile Elements in the Neisseria Species and Evidence That These Are Involved in Horizontal Gene Transfer in Other Bacteria
Source: Oxford University Press journal article supplement (doi:10.1093/molbev/msm215), 2007-06-29
Supplement: msm215_Supplementary_Data.zip [file msm215_Supplementary_Data.zip › mbe-07-0447-File011_msm215.pdf]

## Supplementary Figures

### All the Described MMEs

Through comparative analysis of the neisserial genome sequences and the PCR and sequence data generated here and previously (Saunders & Snyder, 2002), 40 MME sites have been identified and investigated. Each of these is individually described and relevant GenBank Accession numbers and previous publications concerning each of these MME sites are referenced.

*N. meningitidis* strain MC58

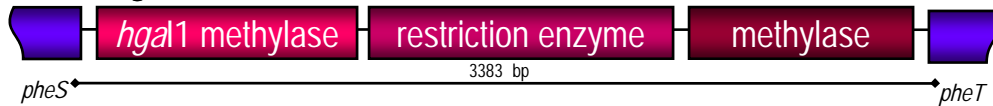

*N. meningitidis* strain Z2491

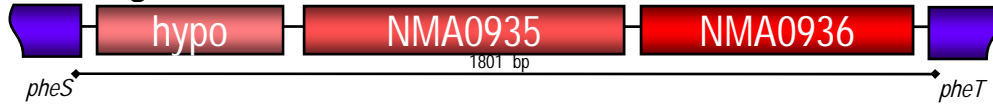

*N. gonorrhoeae* strain FA1090

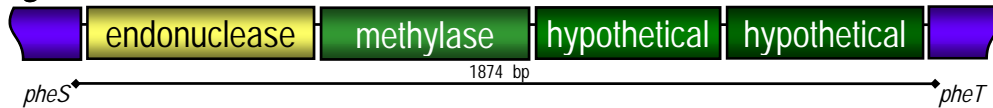

*N. meningitidis* strain FAM18

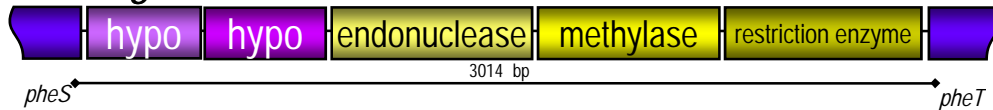

*N. lactamica*

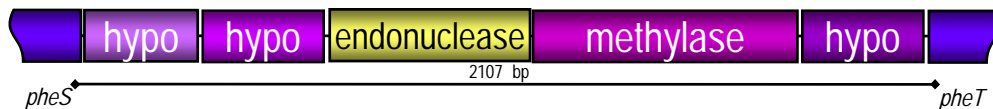

*N. polysaccharea*

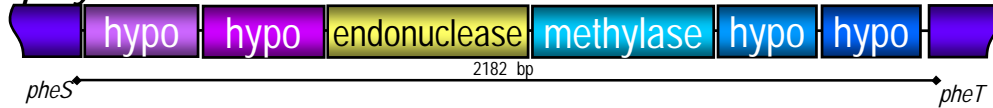

*N. meningitidis* strain 01/241825

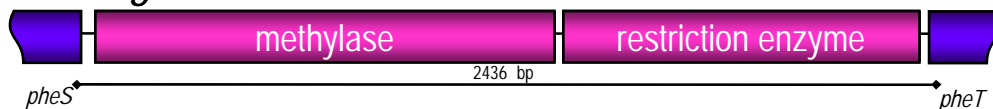

*N. elongata*

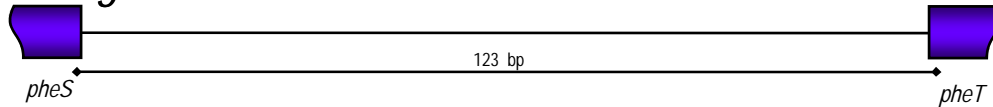

*N. flavescens*

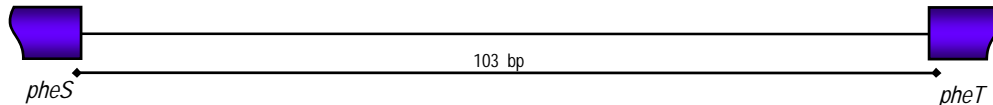

MME*pheST*: Described in Saunders & Snyder, 2002:

*N. lactamica* (AF542177), *N. polysaccharea* (AF542178), *N. elongata* (AF542173), and *N. flavescens* (AF542175). *N. meningitidis* strain 01/241825 sequence is identical to AJ311178.

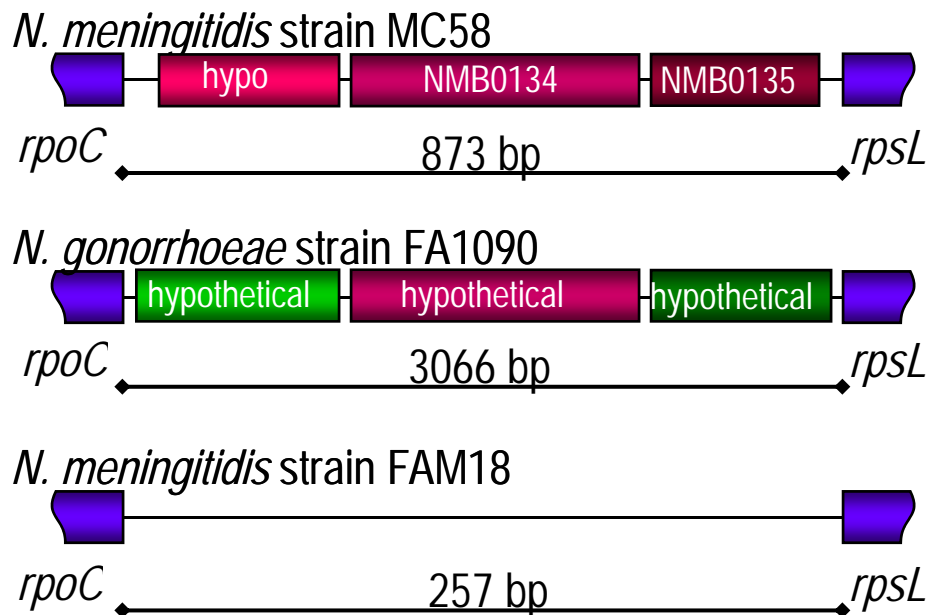

MMErpoCrpsL: Three different MME regions have been identified in this MME site. Most of the *N. meningitidis* strains investigated have an MC58-like MMErpoCrpsL. *N. meningitidis* strain FAM18, however, has an empty MMErpoCrpsL, as does *N. polysaccharea*. The *N. gonorrhoeae* MMErpoCrpsL contains a hypothetical gene with homology to NMB0134, but the other genes in the gonococcal MME region differ from the MC58-like MMErpoCrpsL.

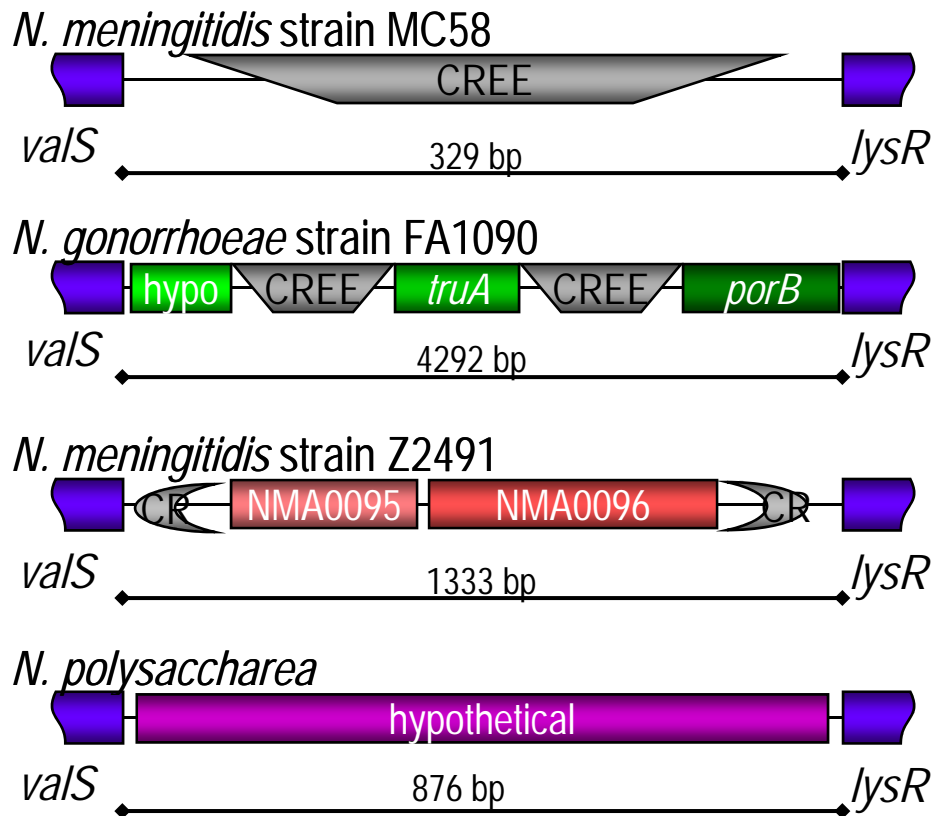

MME *valS/lysR*: Four different MME regions have been identified in this MME site. Most of the *N. meningitidis* strains investigated have an MC58-like MME *valS/lysR*. The *N. lactamica* and *N. gonorrhoeae* strains have the FA1090-like MME *valS/lysR*. A new sequence was identified in *N. polysaccharea* (DQ115757). CREE: Correia Repeat Enclosed Element. CR: Correia Repeat. There are three LysR family regulators in the *N. gonorrhoeae* strain FA1090 genome.

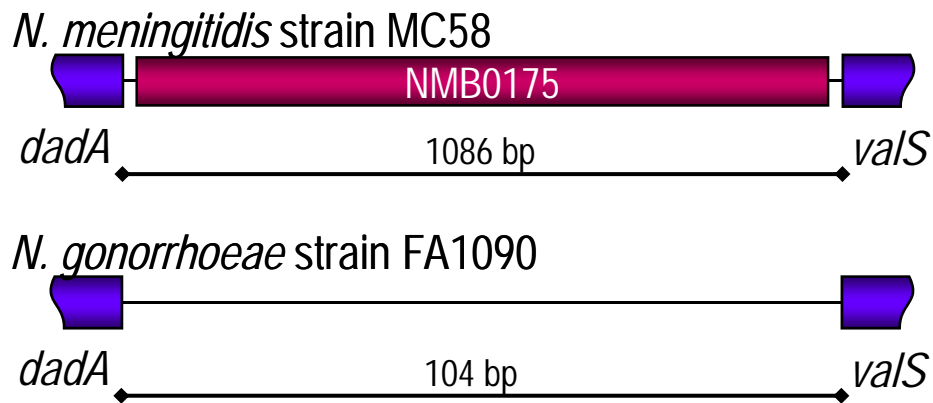

MME *dadAvalS*: Two different MME regions have been identified in this MME site. The *N. meningitidis* strains investigated have an MC58-like MME *dadAvalS*, containing one hypothetical gene. The *N. gonorrhoeae* MME *dadAvalS* is empty.

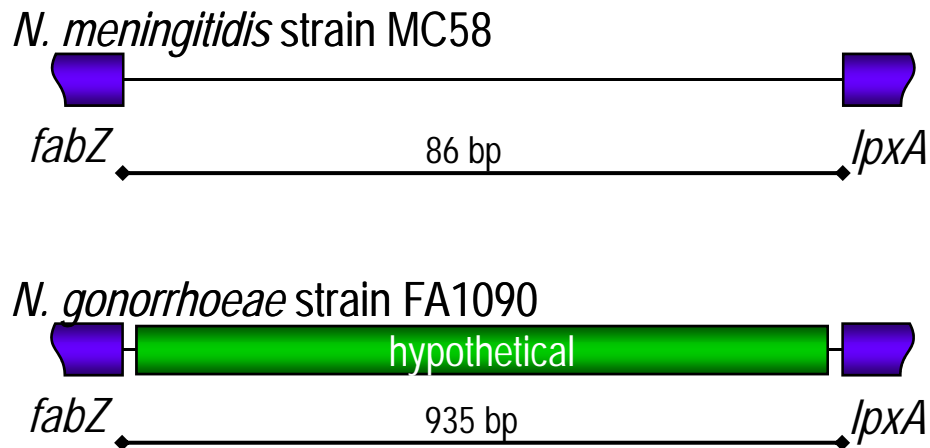

MME *fabZ/lpxA*: Two different MME regions have been identified in this MME site. *N. meningitidis* strain MC58 and 4 strains investigated here are empty at MME *fabZ/lpxA*. All other strains investigated have an FA1090-like MME *fabZ/lpxA*, although polymorphisms in *DprnII* sites differentiate those like strain Z2491 and those like strain FAM18, which both also have this single hypothetical gene in this MME site.

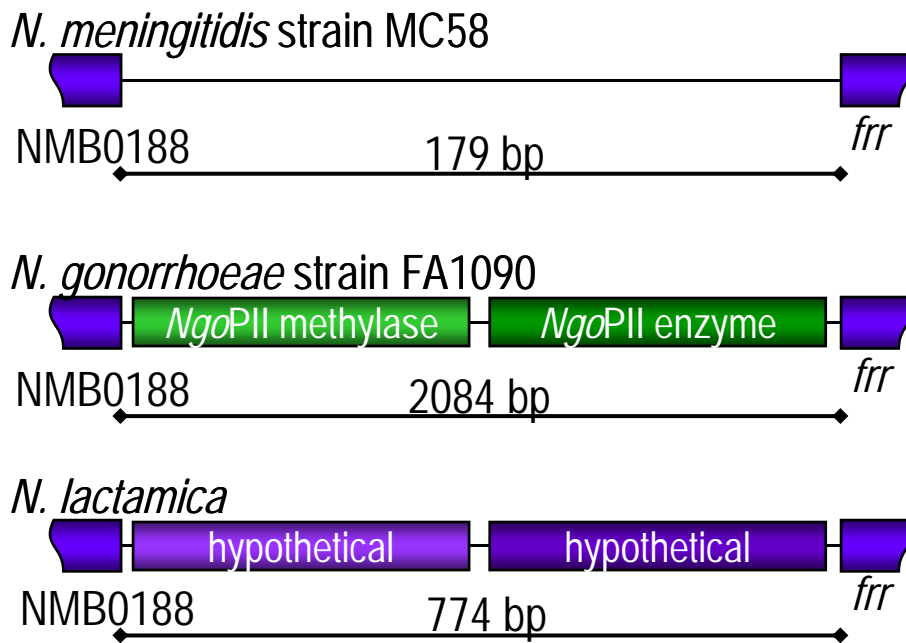

MME *frr*: Three different MME regions have been identified in this MME site. The *N. meningitidis* strains investigated here are empty at MME *frr*. The *N. gonorrhoeae* strains have the *NgolI* restriction-modification system at the MME *frr* site. Two new hypothetical genes were identified in *N. lactamica* (DQ115758).

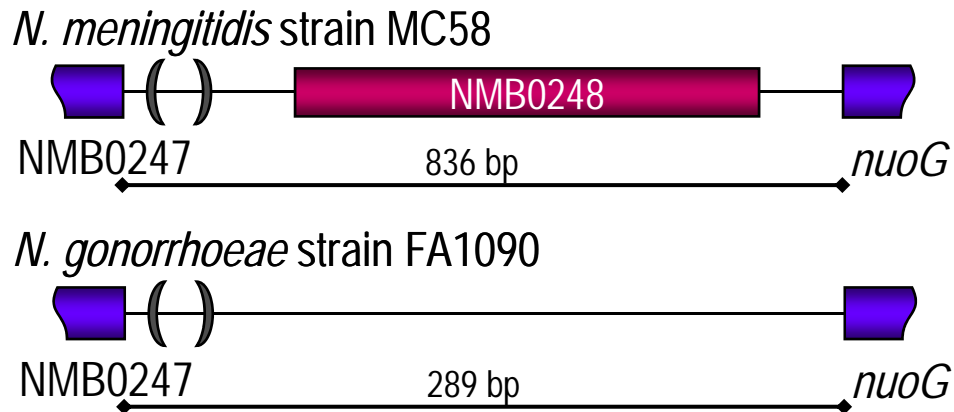

MME *nuoG*: Two different MME regions have been identified in this MME site. Most of the strains investigated here are empty at MME *nuoG*. *N. meningitidis* strains MC58, Z2491, and 01/241825 have a hypothetical gene at this site. Both of the MME regions identified at this site contain an inverted repeat sequence (crescents).

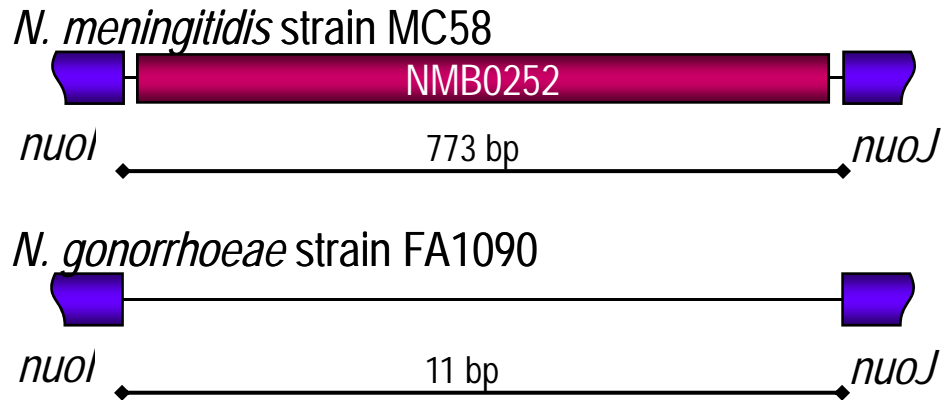

MME *nuoIJ*: Two different MME regions have been identified in this MME site. Most of the strains investigated here are empty at MME *nuoIJ*, like *N. gonorrhoeae* strain FA1090. *N. meningitidis* strains MC58, Z2491, 97/282675, and 00/240868 have a hypothetical gene at this site.

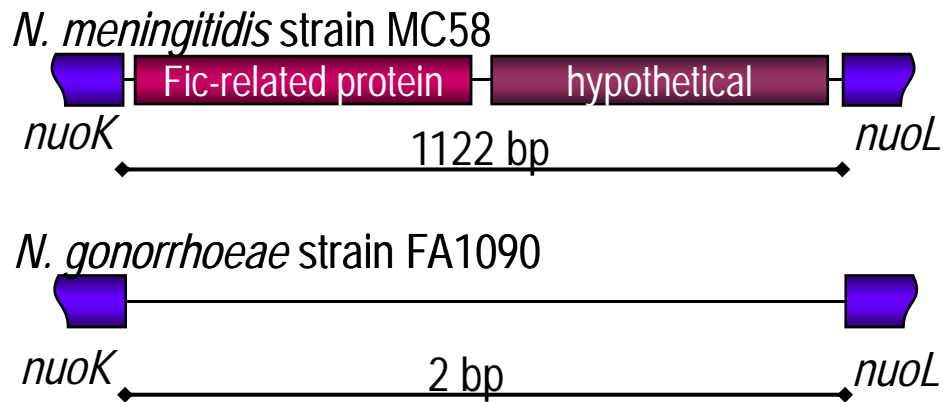

MME *nuoKL*: Two different MME regions have been identified in this MME site. The *N. meningitidis* strains investigated here all have two genes between *nuoK* and *nuoL*, one of which has homology to Fic-related cell filamentation / cell division genes. In the *N. gonorrhoeae* strains and *N. lactamica* MME *nuoKL* is empty.

*N. meningitidis* strain MC58

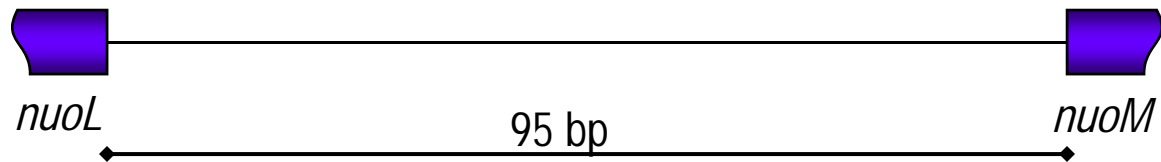

*N. meningitidis* strain Z2491

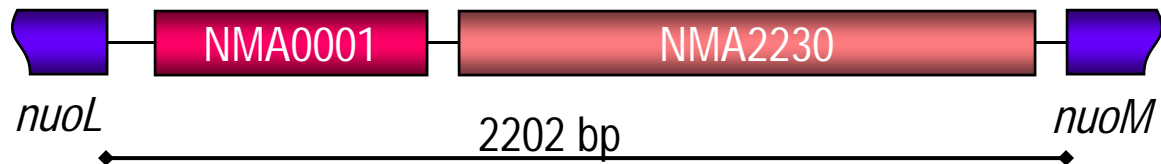

*N. gonorrhoeae* strain FA1090

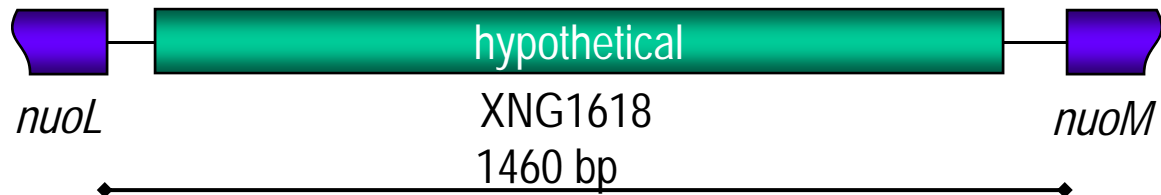

*N. gonorrhoeae* strain MS11

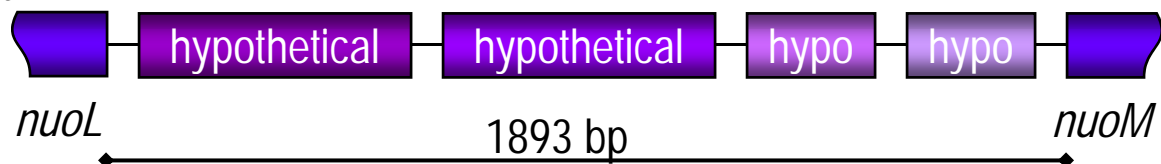

MME *nuoLM*: Four different MME regions have been identified in this MME site. The sequence of MME *nuoLM* from *N. gonorrhoeae* strain MS11 (AY386266) was obtained previously (Snyder, Davies & Saunders, 2004).

*N. meningitidis* strain Z2491

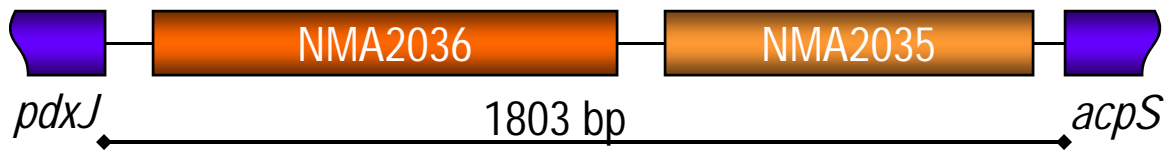

*N. meningitidis* strain MC58

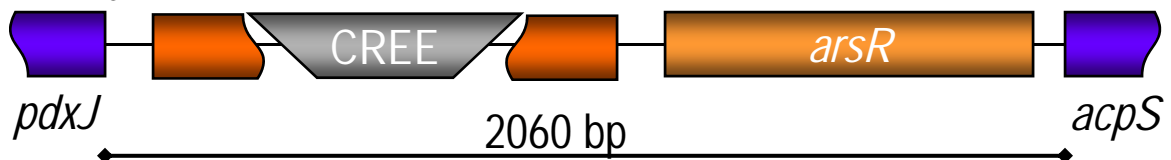

*N. gonorrhoeae* strain FA1090

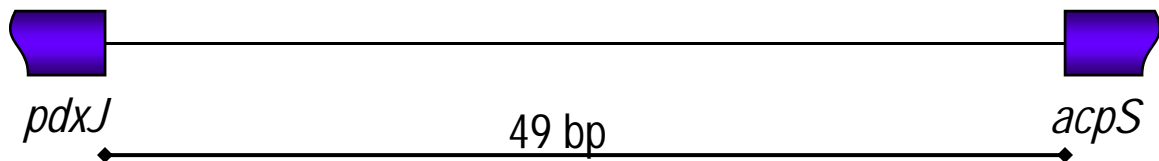

MME*pdxJ**acpS*: Three different MME regions have been identified in this MME site. The *N. meningitidis* strains investigated here all have the CREE (Correia Repeat Enclosed Element) within the NMA2036 homologue. *N. lactamica*, *N. polysaccharea*, and the *N. gonorrhoeae* strains all have an empty MME*pdxJ**acpS*.

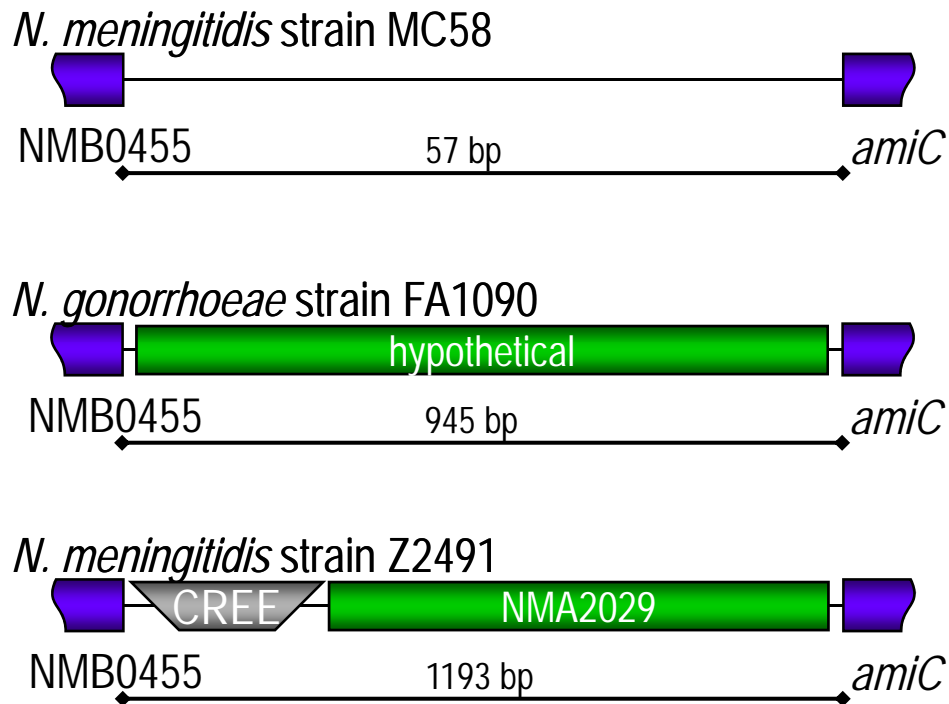

MME *amiC*: Three different MME regions have been identified in this MME site. *N. meningitidis* strains MC58 and NG E30, *N. lactamica*, and *N. polysaccharea* have an empty MME *amiC*. All other strains investigated contain the hypothetical gene NMA2029 at this MME site. In all of the *N. meningitidis* strains investigated that have NMA2029, a CREE (Correia Repeat Enclosed Element) is also present in MME *amiC*.

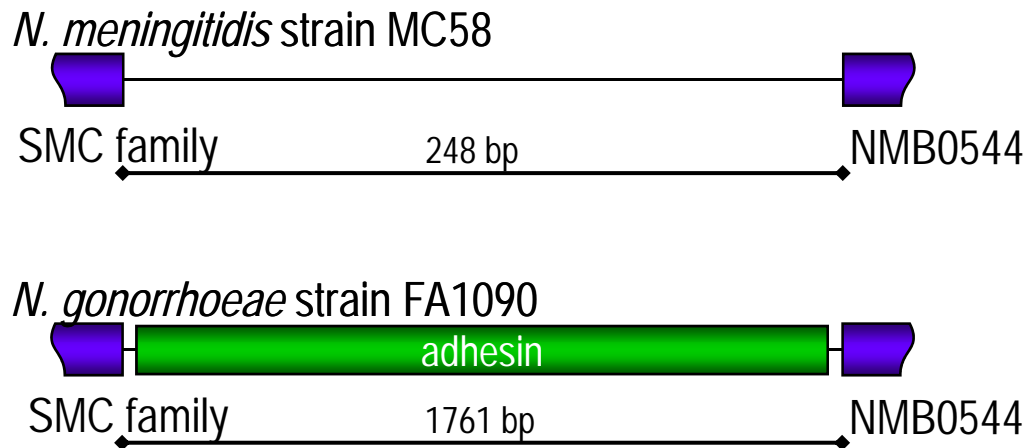

MMESMC: Two different MME regions have been identified in this MME site. The *N. meningitidis* strains investigated here have an empty MMESMC. The *N. gonorrhoeae* strains and *N. lactamica* have an adhesin in MMESMC that has been demonstrated to contain a phase variable repeat tract (Jordan, Snyder & Saunders 2005). This gene contains other frame-shifts in *N. gonorrhoeae* strain FA1090, however.

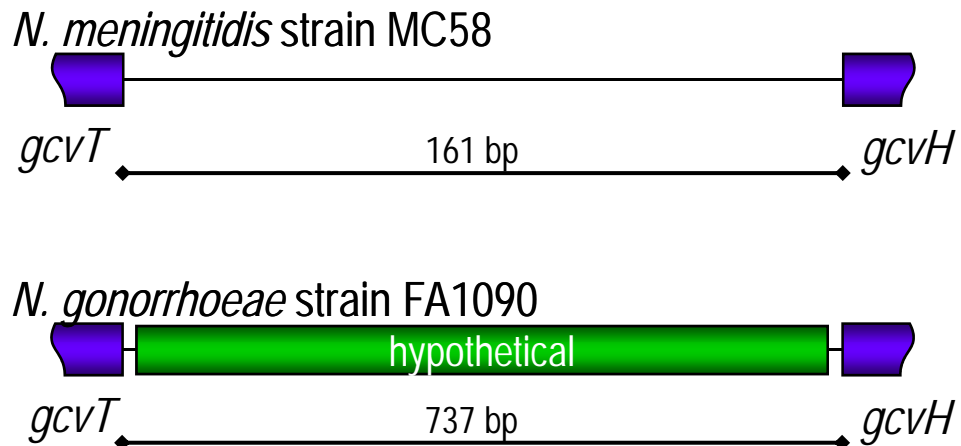

MMEgcvTH: Two different MME regions have been identified in this MME site. The *N. meningitidis*, *N. lactamica*, and *N. polysaccharea* strains investigated here have an empty MMEgcvTH. The *N. gonorrhoeae* strains contain a hypothetical gene.

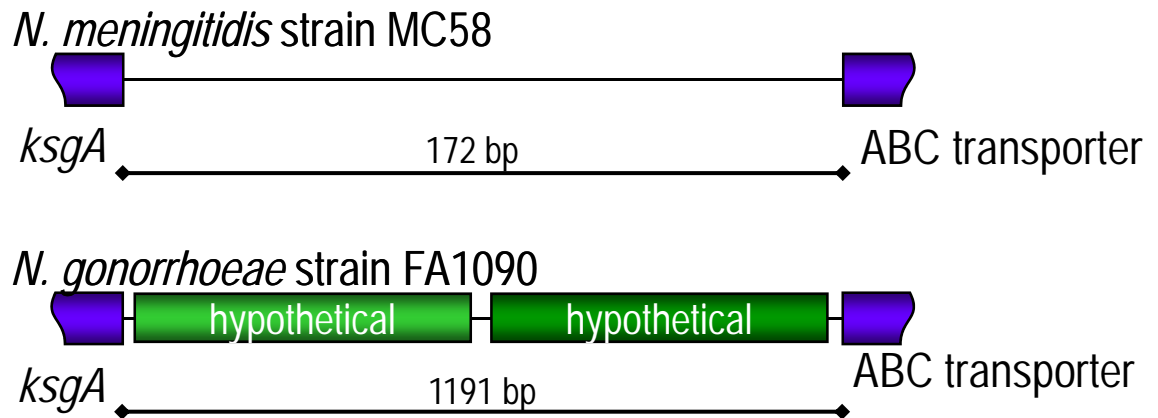

MME*ksgA*: Two different MME regions have been identified in this MME site. The *N. meningitidis* strains investigated here have an empty MME*ksgA*. The *N. gonorrhoeae* strains, *N. lactamica*, and *N. polysaccharea* have two hypothetical genes in MME*ksgA*.

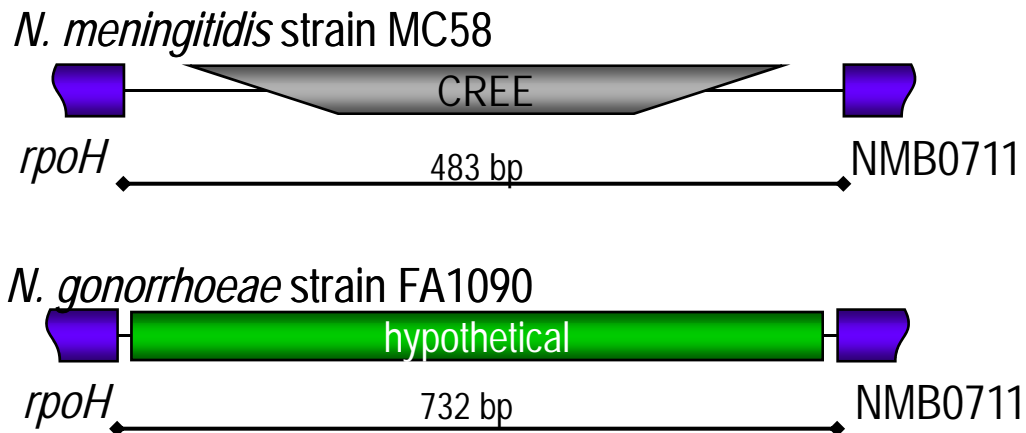

MME $rpoH$ : Two different MME regions have been identified in this MME site. The *N. meningitidis*, *N. lactamica*, and *N. polysaccharea* strains investigated here contain a CREE (Correia Repeat Enclosed Element) at MME $rpoH$ . The *N. gonorrhoeae* strains contain a hypothetical gene in MME $rpoH$ .

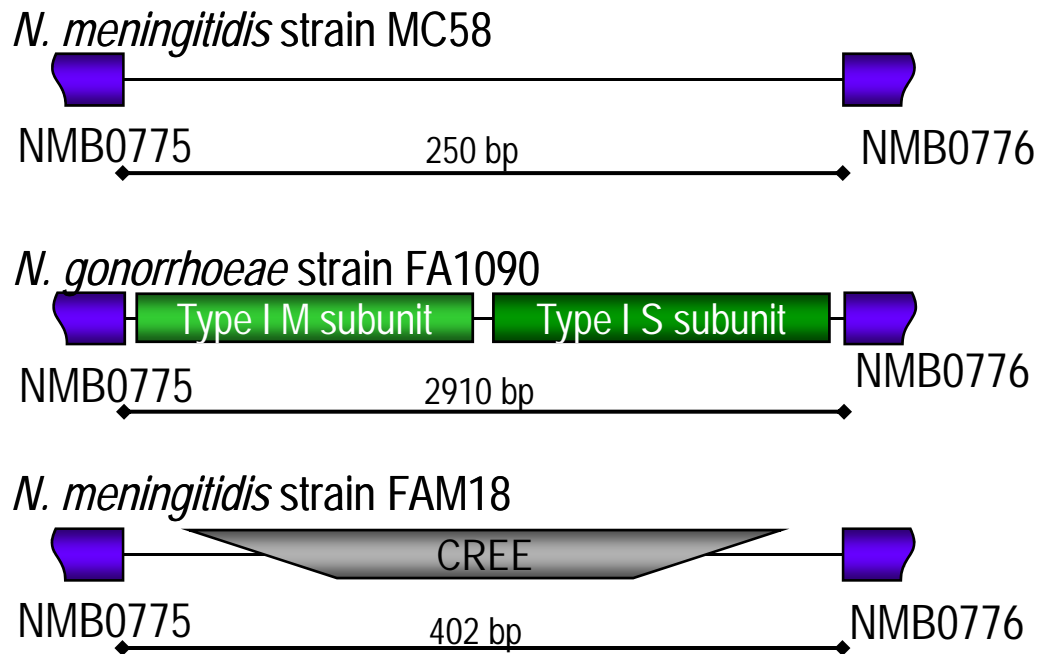

MMENMB0775-6: Three different MME regions have been identified in this MME site. The *N. meningitidis* strains investigated here either have an empty MMENMB0775-6 or contain a CREE (Correia Repeat Enclosed Element). The *N. gonorrhoeae* strains contain a Type I restriction-modification system methylase and DNA specificity protein.

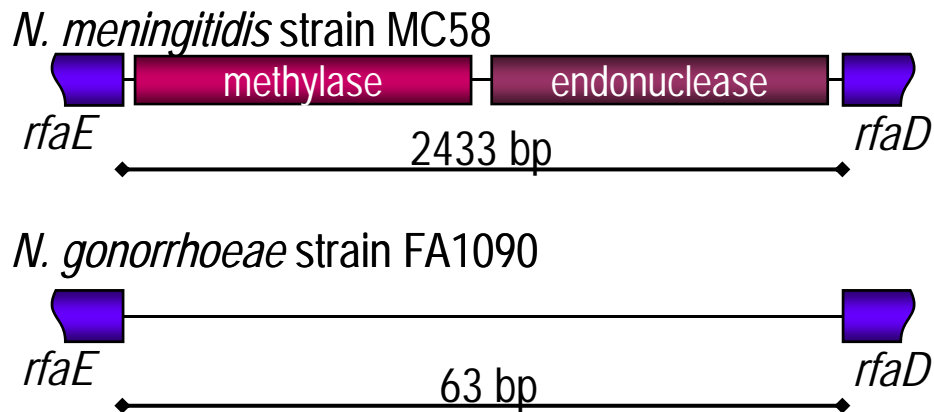

MME*rfaED*: Two different MME regions have been identified in this MME site. In *N. meningitidis* strains MC58, Z2491, FAM18, 00/240794, and NG E30 the genes for a Type II restriction-modification system are present between *rfaE* and *rfaD*. This site was identified previously by Klee, *et al.* (2000) as one of 8 genetic islands that distinguish *N. meningitidis* from *N. gonorrhoeae*.

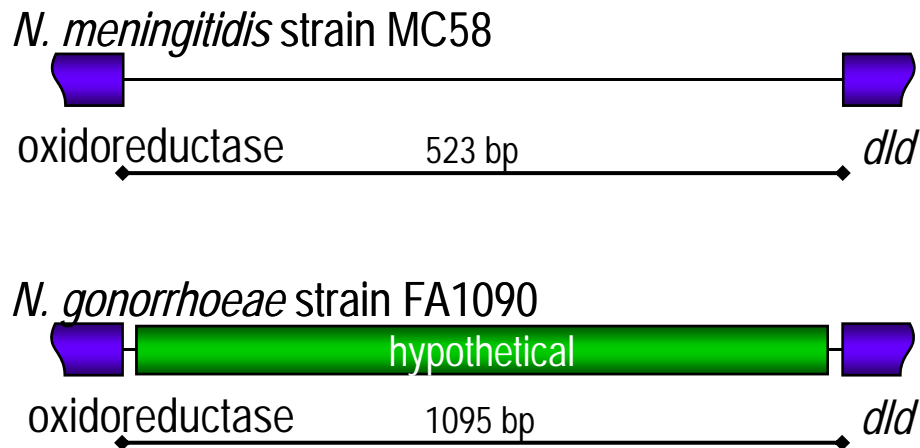

MME *dld*: Two different MME regions have been identified in this MME site. The *N. meningitidis* and *N. gonorrhoeae* strains used in this study have either the empty MME *dld*, as in strain MC58, or contain the hypothetical gene, as in strain FA1090.

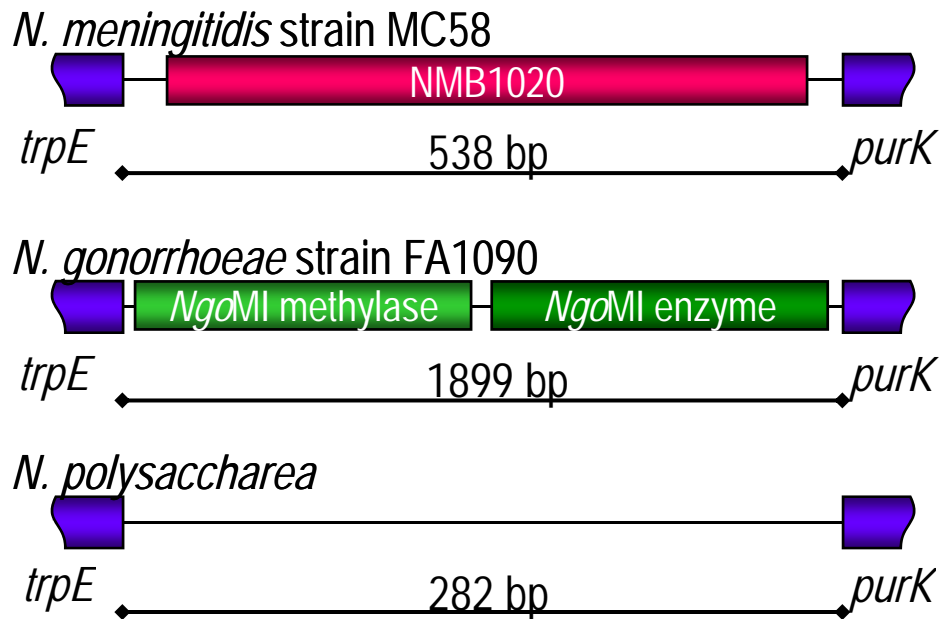

MME *trpE**purK*: Three different MME regions have been identified in this MME site. *N. lactamica* and most of the *N. meningitidis* strains investigated here contain a hypothetical gene, NMB1020, at MME *trpE**purK*. The *N. gonorrhoeae* strains and *N. meningitidis* strain NG E30 have the *NgoMl* restriction-modification system at the MME *trpE**purK* site. An empty MME *trpE**purK* was identified in *N. polysaccharea* (DQ115761).

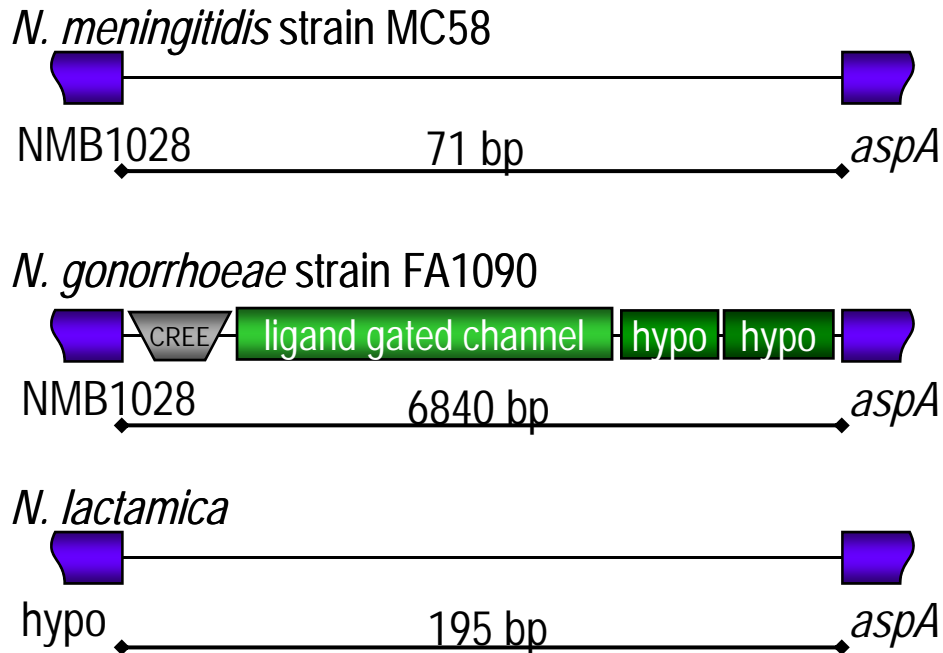

MME *aspA*: Three different MME regions have been identified in this MME site. The *N. polysaccharea* and *N. meningitidis* strains investigated here contain an empty MME *aspA*. *N. gonorrhoeae* strain FA1090 contains 3 genes, including a gene encoding a TonB-dependent ligand gated channel protein. An empty MME *aspA* with a larger intergenic region than in strain MC58 was identified in *N. lactamica* (DQ115762) and *N. meningitidis* strain 00/240794.

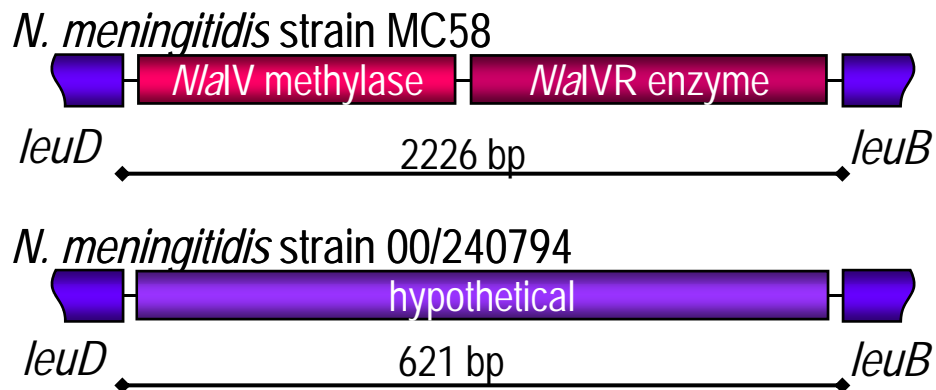

MME/*leuDB*: Two different MME regions have been identified in this MME site. Although the genome sequences analyzed in this study all had the MC58-like MME/*leuDB*, the location of this restriction-modification system between the *leuD* and *leuB* genes lead to investigation of this site. A hypothetical gene was identified in *N. meningitidis* strain 00/240794 (DQ115763).

*N. meningitidis* strain MC58

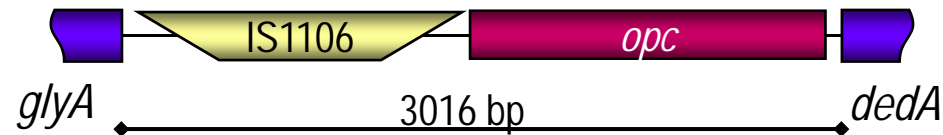

*N. gonorrhoeae* strain FA1090

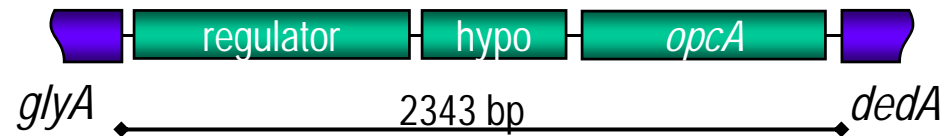

*N. meningitidis* strain Z2491

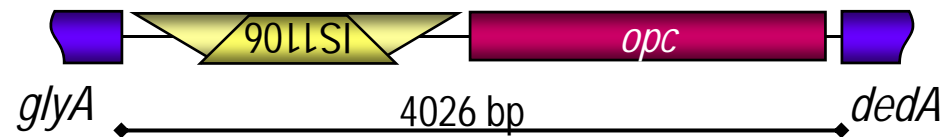

*N. meningitidis* strain FAM18

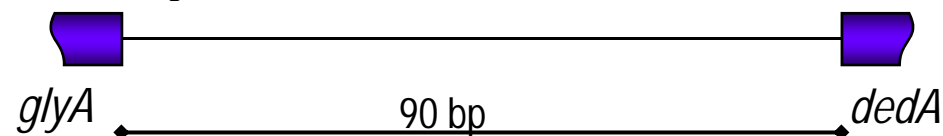

*N. polysaccharea* strain 89357

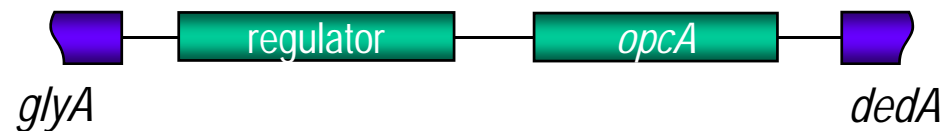

MME<sub>glyA</sub>dedA: Five different MME regions have been identified in this MME site, including an empty MME<sub>glyA</sub>dedA in *N. meningitidis* strain FAM18. This site has been investigated previously (Zhu, *et al.*, 2003), identifying the *N. polysaccharea* MME<sub>glyA</sub>dedA shown (AY072809).

*N. meningitidis* strain MC58

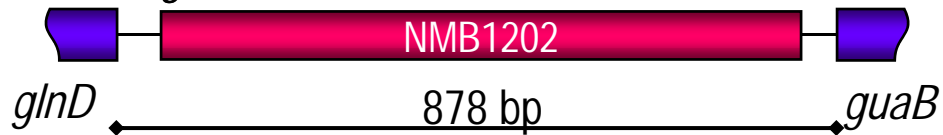

*N. gonorrhoeae* strain FA1090

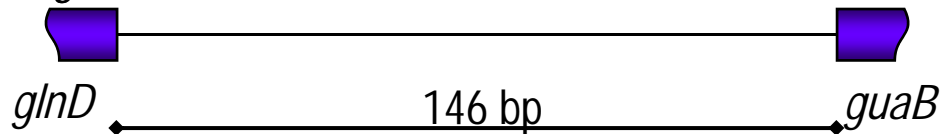

MME *glnDguaB*: Two different MME regions have been identified in this MME site. *N. meningitidis* strains MC58, Z2491, 00/240868, and NG E30, and *N. polysaccharea* have an MME *glnDguaB* that contains the hypothetical gene NMB1202.

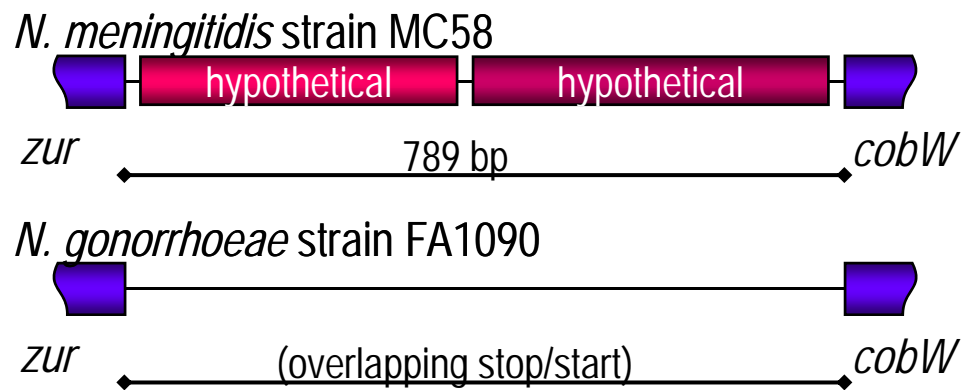

MME<sub>zurcobW</sub>: Two different MME regions have been identified in this MME site. *N. meningitidis* strain MC58 is the only strain investigated that contains the two hypothetical genes, NMB1265 and NMB1264, within MME<sub>zurcobW</sub>.

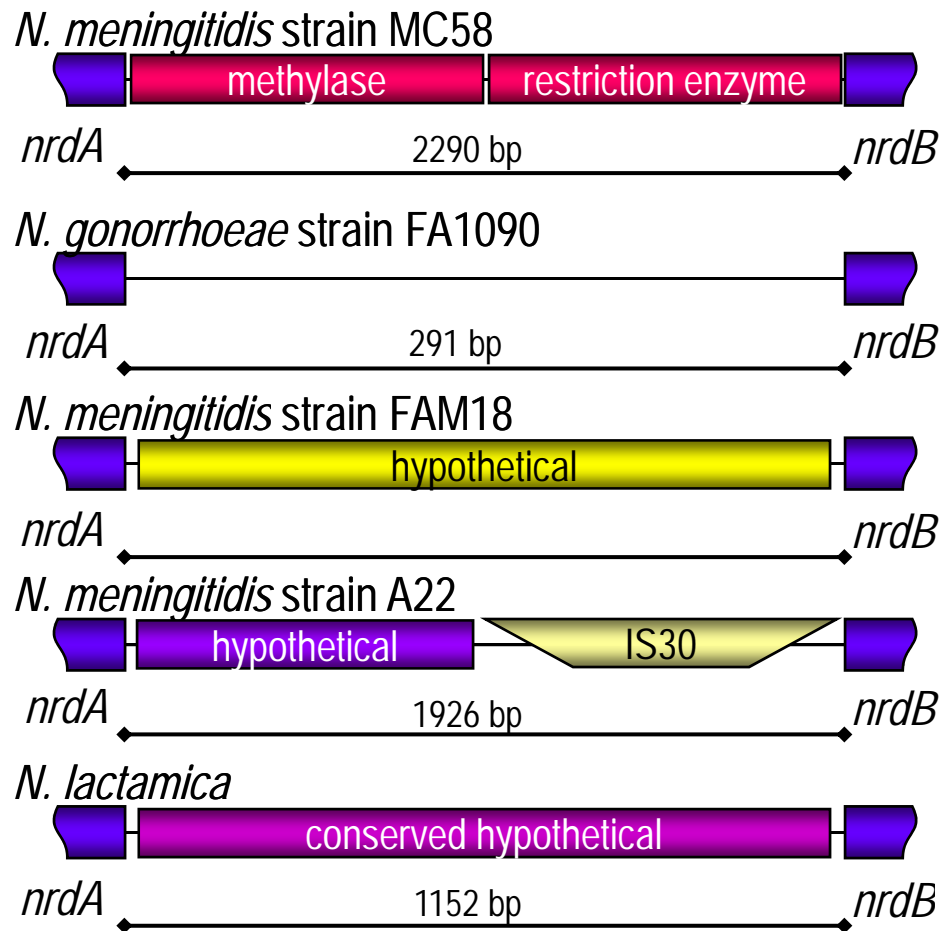

MME *nrdAB*: Five different MME regions have been identified in this MME site. *N. meningitidis* strain A22 contains a newly identified hypothetical gene and an IS30 at MME *nrdAB* (DQ115764). *N. lactamica* contains a large conserved hypothetical gene at this MME site (DQ115765).

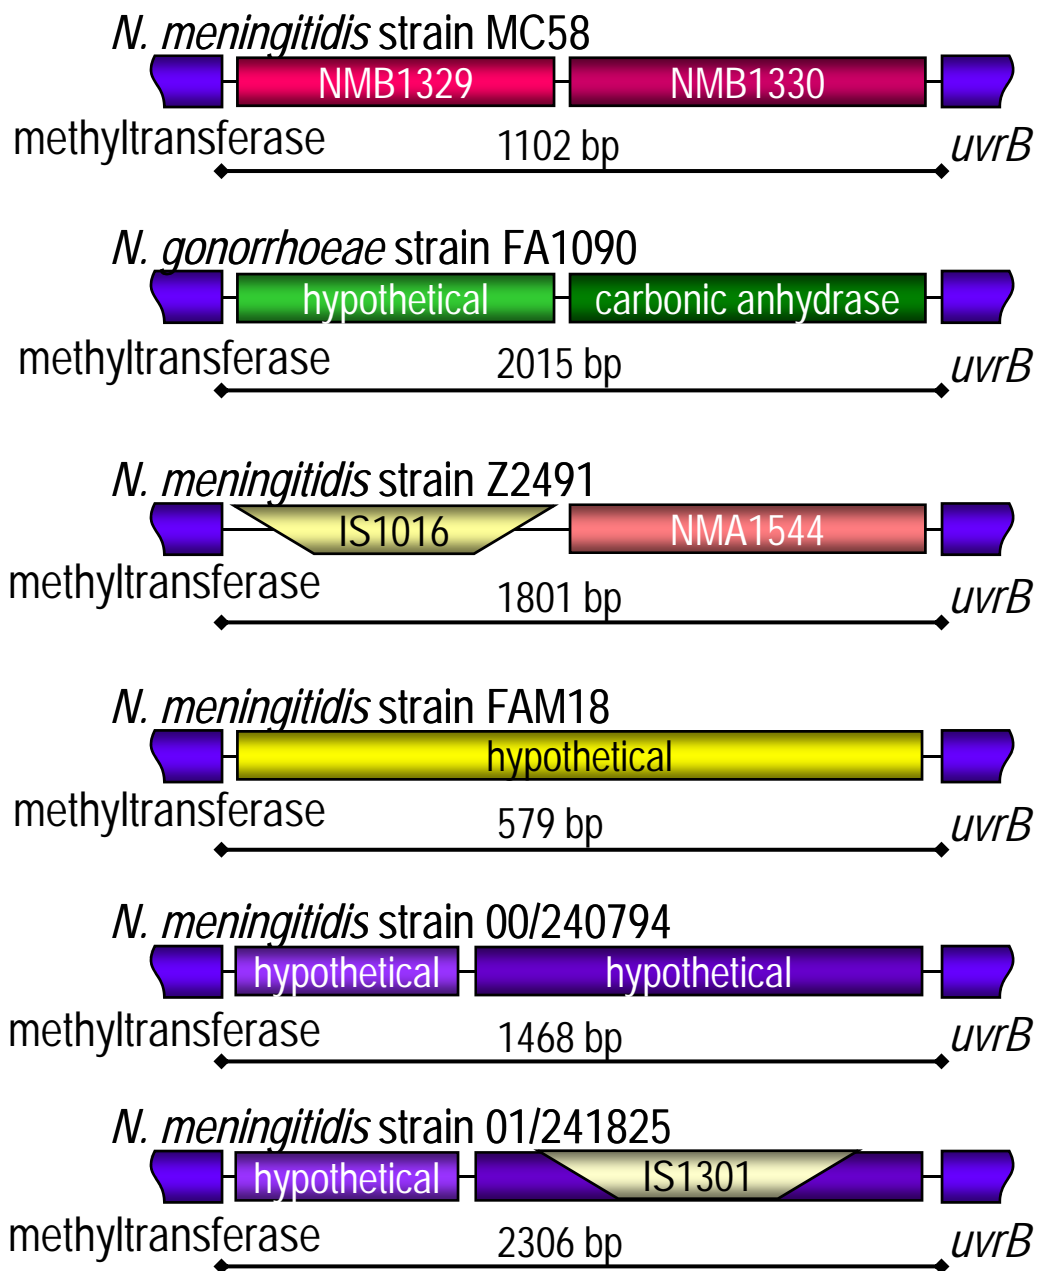

MME *uvrB*: Five different MME regions have been identified in this MME site. A new region was identified in *N. meningitidis* strain 00/240794 (DQ115766). A similar region is present in *N. meningitidis* strains 01/241825 and NG E30, but an IS1301 has inserted.

*N. meningitidis* strain MC58

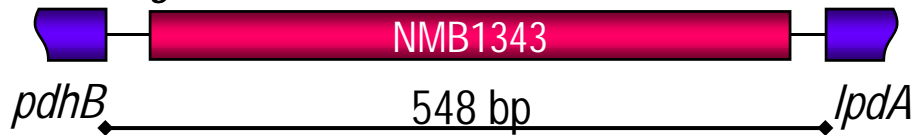

*N. meningitidis* strain Z2491

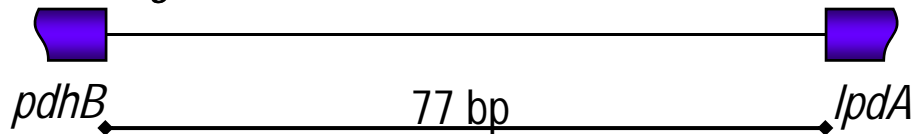

MME*pdhB**lpdA*: Two different MME regions have been identified in this MME site. Most of the strains investigated here are empty at MME*pdhB**lpdA*. *N. meningitidis* strains MC58 and NG E30 and the *N. gonorrhoeae* strains contain a hypothetical gene homologous to NMB1343 at MME*pdhB**lpdA*.

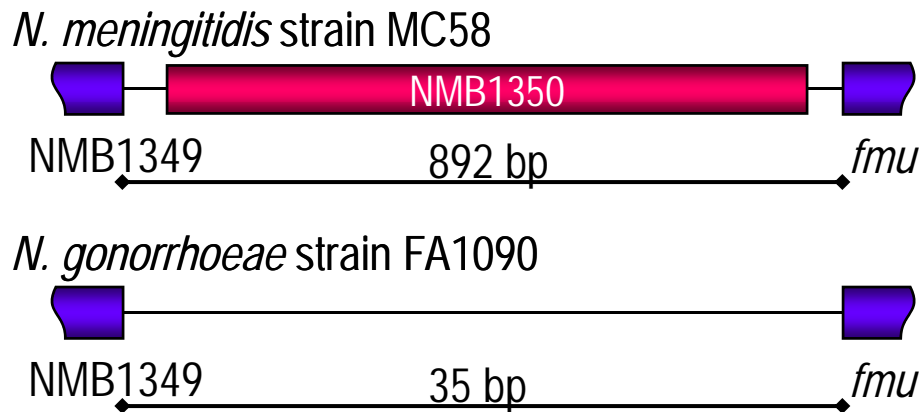

MME *fmu*: Two different MME regions have been identified in this MME site. Most of the strains investigated here contain a hypothetical gene homologous to NMB1350 at MME *fmu*. The *N. gonorrhoeae* strains and *N. meningitidis* strain 01/241825 are empty at MME *fmu*.

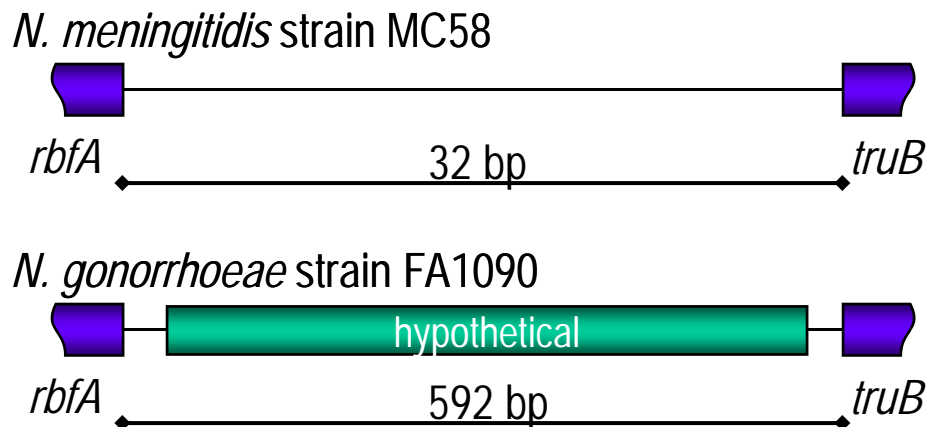

MME $rbfAtruB$ : Two different MME regions have been identified in this MME site. Strains either have an empty MME $rbfAtruB$ , as in *N. meningitidis* strains MC58 and FAM18, or the MME $rbfAtruB$  contains a hypothetical gene homologous to NMA1587, as in *N. gonorrhoeae* strain FA1090 and *N. meningitidis* strain Z2491.

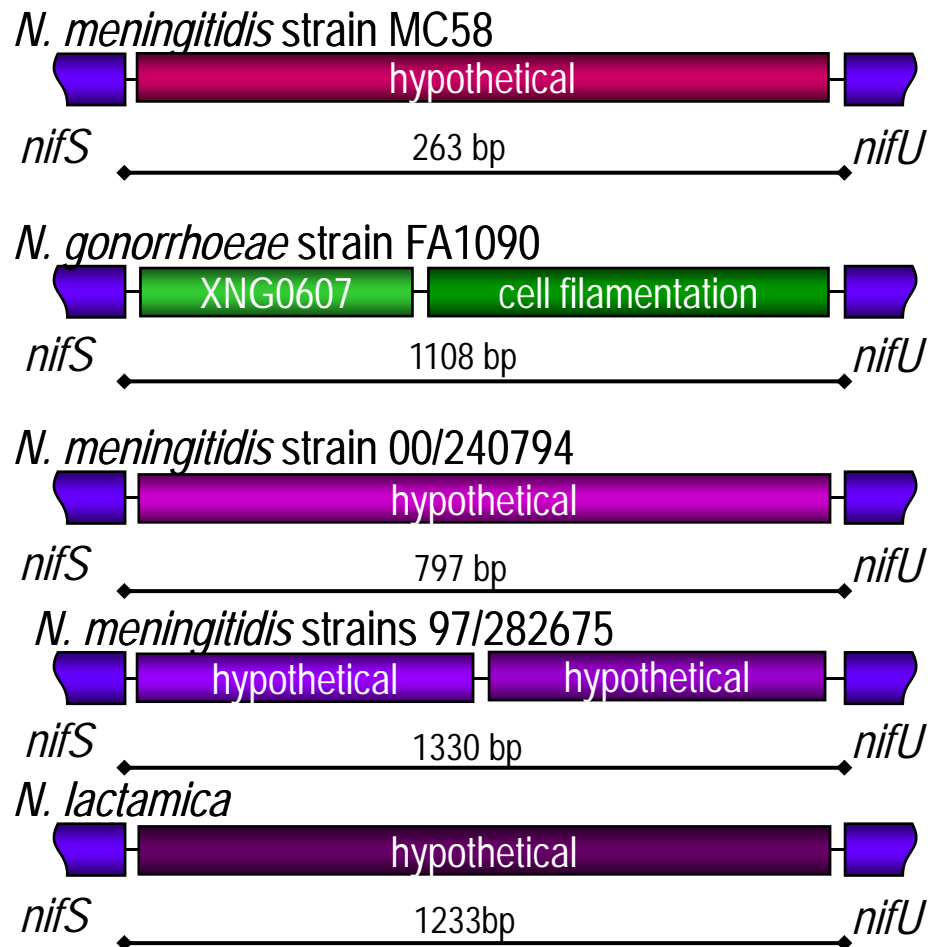

MME *nifSU*: Five different MME regions have been identified in this MME site. Three new MME regions were identified here. *N. meningitidis* strains 97/282675, 00/240868, and NG E30 contain two newly identified hypothetical genes (DQ115768), while *N. meningitidis* strain 00/240794 (DQ115767) and *N. lactamica* (DQ115769) each contain one newly identified gene.

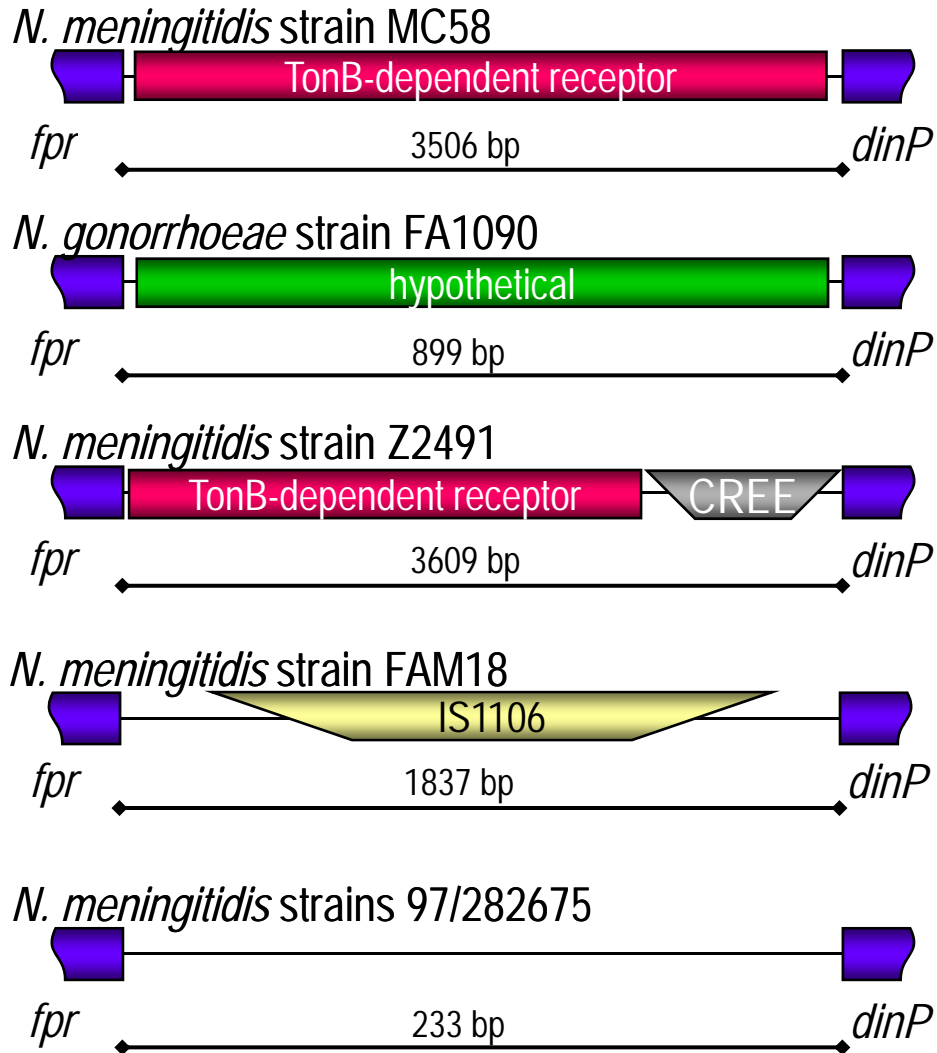

MME *fprdinP*: Five different MME regions have been identified in this MME site. Each of the genome sequences investigated contains a different region at MME *fprdinP*. *N. meningitidis* strains 97/282675 and 00/240868 are empty at MME *fprdinP* (DQ115770).

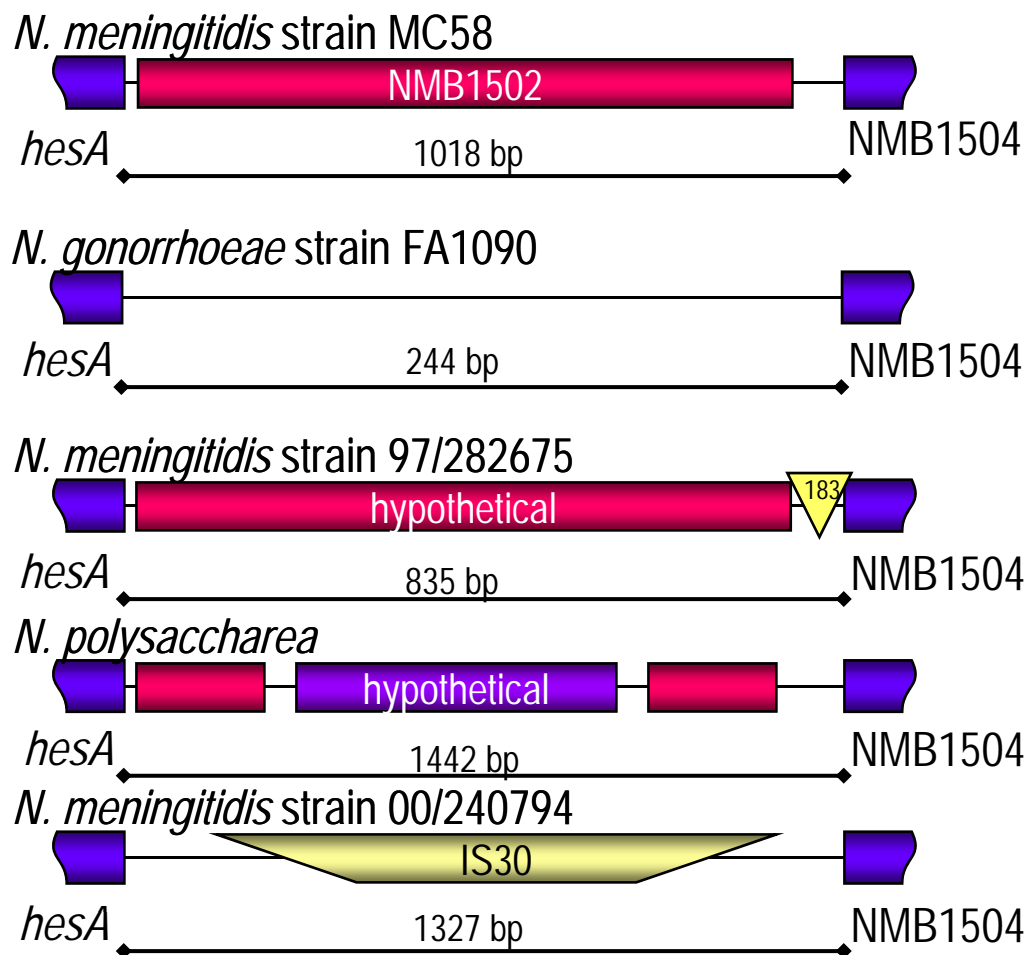

MME *hesA*: Five different MME regions have been identified in this MME site. The *N. meningitidis* strain 97/282675 MME *hesA* is similar to that from *N. meningitidis* strain MC58, but there is a 183 bp indel present in MC58 and absent in 97/282675 (DQ115772) and 00/240868. NMB1502 is interrupted in *N. polysaccharea* by a hypothetical gene (DQ115773) and an IS30 is found in MME *hesA* in *N. meningitidis* strain 00/240794 (DQ115771).

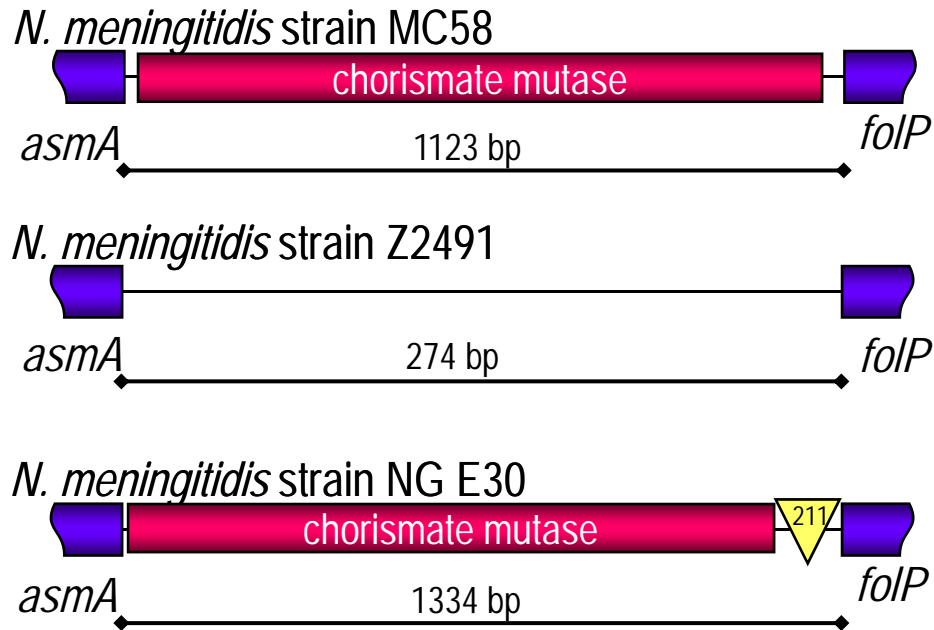

MME *asmAfolP*: Three different MME regions have been identified in this MME site. *N. meningitidis* strains MC58 and NG E30 both contain a chorismate mutase at MME *asmAfolP*, but in strain NG E30 there are 211 bp with homology to a fragment of IS1106 (DQ115777).

*N. meningitidis* strain MC58

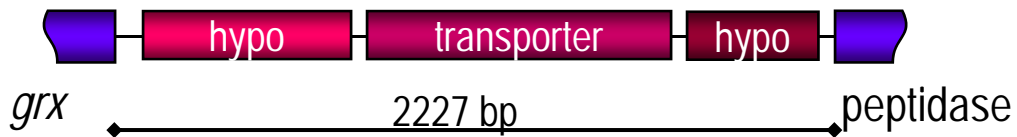

*N. gonorrhoeae* strain FA1090

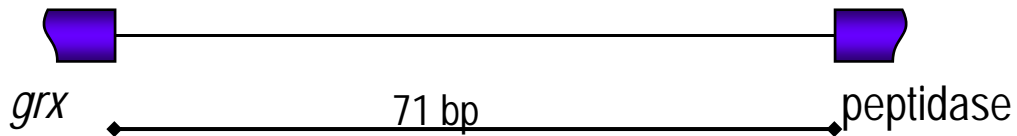

*N. meningitidis* strain 860800

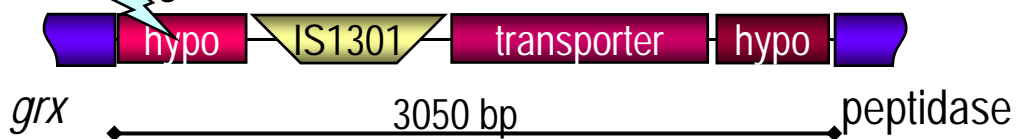

MME<sub>grx</sub>: Three different MME regions have been identified in this MME site. *N. meningitidis* strains MC58 and 860800 both contain three genes at MME<sub>grx</sub>, but in strain 860800 there is also an IS1301 and a 22 bp deletion in the hypothetical gene NMB1733, which results in a frame-shift (DQ115774).

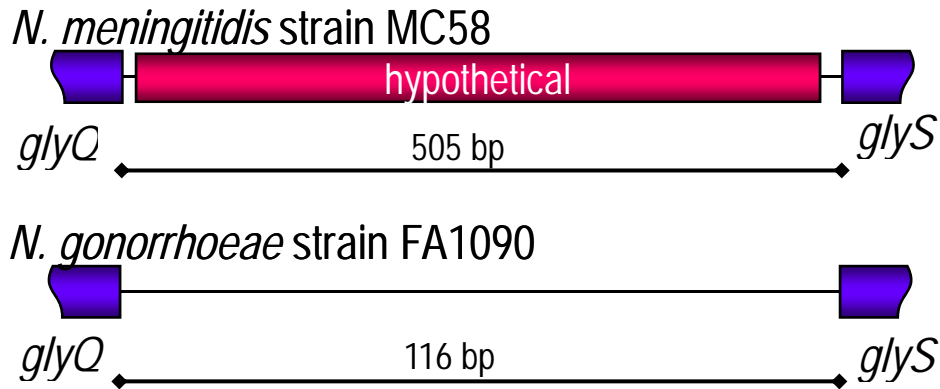

MME *glyQS*: Two different MME regions have been identified in this MME site. The *N. gonorrhoeae* strains studied are empty at MME *glyQS*. Most of the *N. meningitidis* strains investigated contain a hypothetical gene, but strains 00/240868 and 97/282675 are empty like strain FA1090.

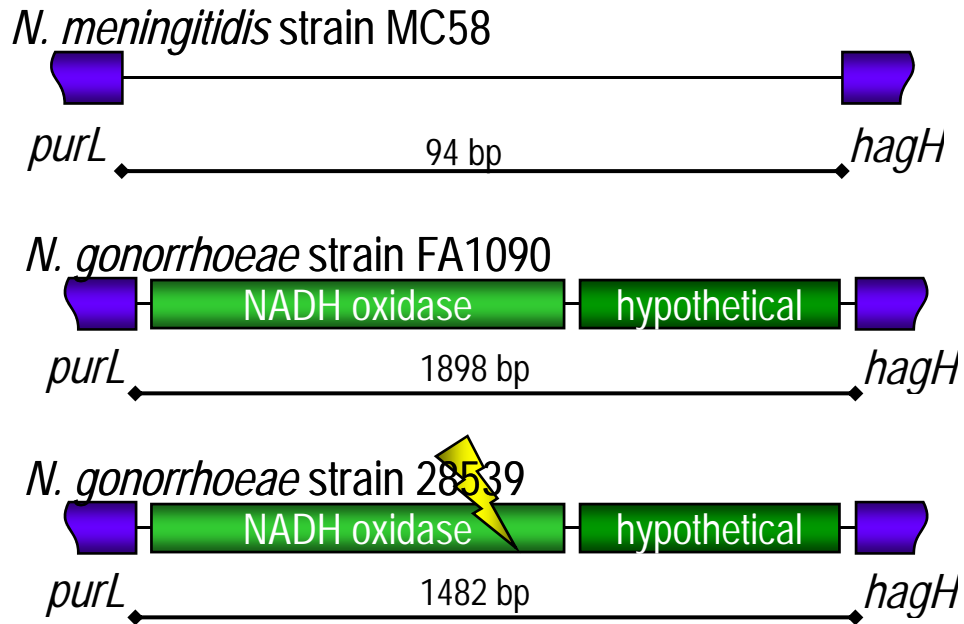

MME*purLhagH*: Three different MME regions have been identified in this MME site. *N. gonorrhoeae* strains 28539 and 26593 contain the two genes found in the *N. gonorrhoeae* strain FA1090 MME*purLhagH*, but there is a 416 bp deletion in the NADH oxidase in the two strains investigated here (DQ115775).

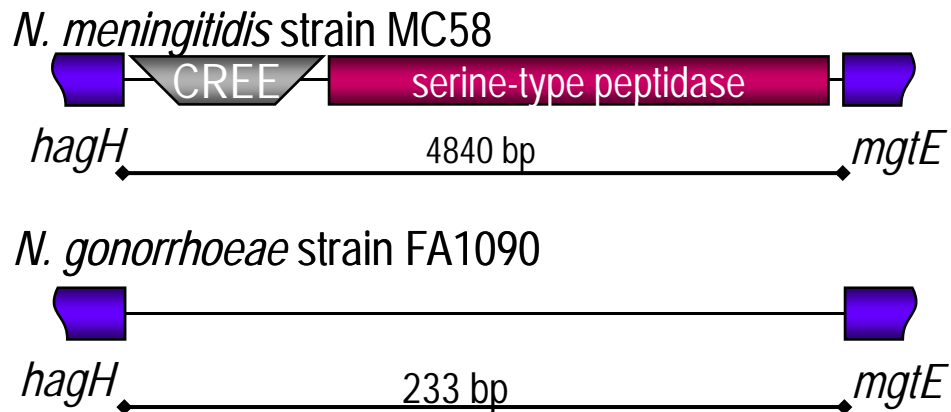

MME *hagHmgtE*: Two different MME regions have been identified in this MME site. *N. meningitidis* strains MC58, A22, and 860800 contain a CREE (Correia Repeat Enclosed Element) and a serine-type peptidase gene. The *N. gonorrhoeae* strains, *N. meningitidis* strains 00/240794 and NG E30, *N. lactamica*, and *N. polysaccharea* are empty at MME *hagHmgtE*.

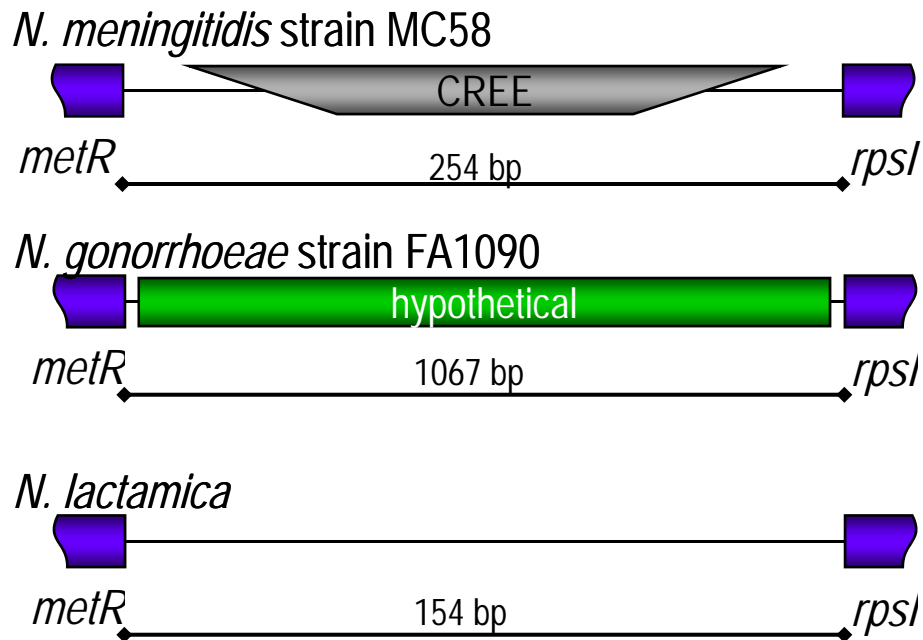

MME $metRrpsI$ : Three different MME regions have been identified in this MME site. The *N. gonorrhoeae* and *N. polysaccharea* strains contain a hypothetical gene at MME $metRrpsI$ . The *N. meningitidis* strains have a CREE (Correia Repeat Enclosed Element) at this location. In *N. lactamica*, MME $metRrpsI$  is empty (DQ117942).

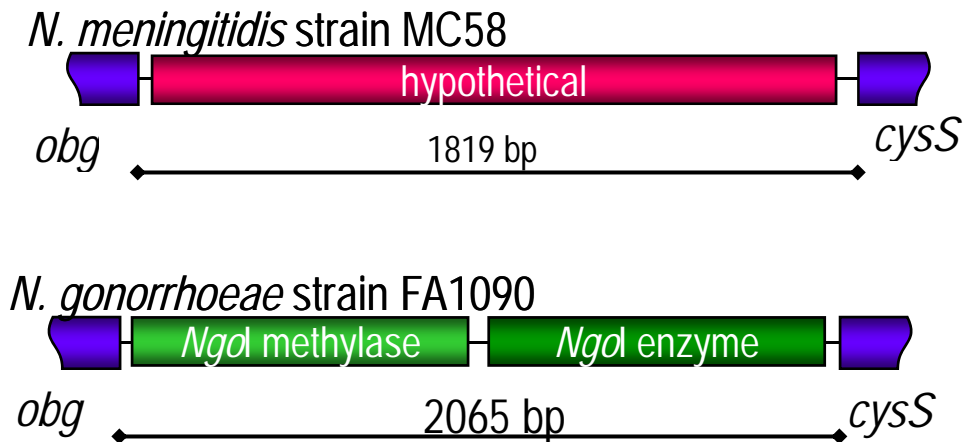

MME *obgcysS*: Two different MME regions have been identified in this MME site. Most of the *N. meningitidis* strains and *N. lactamica* have a hypothetical gene at MME *obgcysS*. The *N. gonorrhoeae* strains, *N. polysaccharea*, and *N. meningitidis* strain 01/241825 contain the *Ngd* restriction-modification system at MME *obgcysS*.
