# Supplementary material for: The Repertoire of Minimal Mobile Elements in the Neisseria Species and Evidence That These Are Involved in Horizontal Gene Transfer in Other Bacteria
Source: Oxford University Press journal article supplement (doi:10.1093/molbev/msm215), 2007-06-29
Supplement: msm215_Supplementary_Data.zip [file msm215_Supplementary_Data.zip › mbe-07-0447-File014_msm215.pdf]

### MMEtrpEpurK

*trpE* joint

MC58 gtgggttgccgactccgatccggcctccgaatggcaggaacacacaaacaaagcccgagccgtcatacacgcccgcgcaaatgggtacaggaaggggtggataaa**tg**acttatgaa.....  
FA1090 gtgggttgccgactccgaCccAAcTtccgaatggcaggaacTcaaaacaaagcccgCgcAgtGGtTcGGgcGgcgcaGatgggtGcaggaaggggtggataaa**tAaAA**tTtCaG..76..ATG..  
N.p. gtAgtttgccgaTtccAatccTgAAtcAgaatggcaggaacGcaaaacaaagcccgTgccgtcatacacgcccgcgcaGatgggtGcaggaaggggtggataGG**TAGG**CtTgGTG..'empty'..  
*purK* joint  
MC58 .....ttgtacaatttgaagagt**cagcatg**aaaaacatatctcttttccgcccgcgatgcttggcatcctcgggcgggacaattaggcagaatgtttaccggttgccgcca  
FA1090 .....ttT**tAaA**CAGAAATTATTCaCT**atg**aaCaCACCCcCAtCCTTccTcccgcgatgctCggcatcctcgggcgggacaattaggcagaatgtttgccggttgccgcTa  
N.p. ..'empty'..AACACAGaCAGATTaAAAGCTatgaaCaaATCCcCAtCCTCcAcccgcTatgctCggcatcctcgggcgggacaattaggcagaatgtttaccggttgccgcca

### MMEglyAdeda

*glyA* joint

MC58 tgccgacgtattgtctaacccccgaagacgaagccaacctcgccaaagtccgcaacaagtaactgctttgtgcaataaataccccgtttacggcgcg**ta**agcctttt..119..atg..  
FA1090 tgccgaTgtattgGctaaTcccgaagacgaagccaacctcgccaaagtccgcGGacaagtGactgcCttgtgcGacaaataaccccgtttacggAA**Ctaa**AcGCCCGA..64..cta..  
FAM18 tgccgacgtattgtctaacccccgaagacgaagcGaaTctGgAAaaCgtccgcaaacAGAtTacCgcCCTCtgcGacaaataaccccgtttacggcgcg**ta**aaCTtttt..'empty'..  
N.p. tgccgacgtTttgtctaacccccgaagaTgaagcGaaTctGgAAaaCgtccgcaaacAGAtTacCgcCCTCtgcGacaaataaccccgtttacggAA**ACtaa**AcGCCCGA..219..ATG..  
*dedA* joint  
MC58 ..tga..155..aacgcgcgcgtgccttgctccgccatcgacttcacctccatcatcgaccaacacacctgctcgcgctgtcgggcgaatacgggtgtgtggatttatgcgattctgtttttga  
FA1090 ..TAA..142..GaAAACcccgtgccttgcttcTgTGatTgaTttTatcctGcatatcgaccaacacacctgctcAGCctgtcgggcgaatacgggtgtgtggatttatgcgattctgtttttga  
FAM18 ..'empty'..aacgcgcgcgtgccttgctccgccatcgacttcacctccatcatcgaccaacacacctgctcgcgctgtcgggcgaatacgggtgtgtggatttatgcgattctgtttttga

### MMEobgcysS

*obg* joint

MC58 tatcgaagctgaaaaagcagaagcggagaaaagcagcggcgaatgttgaaattatcgaacagcagcctaataacggatacaggcgtgtttaagccggag**tg**aaaaaagaa..74..atg..  
FA1090 tatcgaGgctgaaaaagcGaaagcggagaaaagcagcggcgaatgttgaaattatcgaacagcagcctaataacggatacTggcgtgtttaagccggag**ta**aaaGGaCaa..45..ATG..  
*cysS* joint  
MC58 ...tga..679..ataatccc**atg**accaccatctacaacaccctaaccgcgtaaaaaagaacccttttcccccatcgaccctgaaaacgtgcgtatgtacgtctgcggatgaccggtttacg  
FA1090 TAACTTACTTGATGATGAAT**atg**accGccatctacaacaccctTaccgcgtaaaaaagaacccttCGcccccatcgaccctgaaaacgtgcgtatgtacgtctgcggCatgaccggtttacg

### MMEglyQS

*glyQ* joint

MC58 tattggacgtattcgtgcattgagccgcgcgctggcgcaaaaaatatgttgaaagccgcgaaaaactgggcttccctttaatgaaggcaaacgcgc**ctta**agggggcgaa..68..atg..  
FA1090 tattggacgtattcgtgcattgagccgcgcgctggcgcaaaaaatatAtCgaaagccgTgaGaaactgggcttcccGttGatTaaAAA**TaAC**GATAcGTCgTCTgAAA..'empty'..  
*glyS* joint  
MC58 ..tga..73..aaagccga**atg**atgacccaaacccttttaatcgaactccttacggaagaactcccgccaaaagccctgaataatctgggcaaccatttcgcccgttccggttgccgaag  
FA1090 ..'empty'..aGTCTcA**catg**aCAacccaaacccttttaatcgaactccttacggaagaactcccgccaaaagccctgaataatctgggcaaccattttGccgcgttccggttgccgaag

### MMErfaED

*rfaE* joint

MC58 ccgggggttgctgctggcgaaactcggtacggcggttttgctcgtttgccgaattgatcaaggcattgtcagggcaatcaacaat**gtag**ttttcatattgataagataaacagacgatataag**tatg**..  
FA1090 ccgggggttgctgctggcgaaactcggtacggcggttttgctcgtttgccagaGttgGtTgaAgcaCtgGACgggcaat**Aaa**TCTtTtCaGACGGCATGACCATCCaATGCcGTGTGAaACCCCTCaaAA..'empty'..  
*rfaD* joint  
MC58 ..taa..120..agtttattaattttacaaaaacaaaggaaaccgaat**atg**accatcatcgtaacagggcggcgccggtttatcggcagcaacatcgtaaaagcacttaataacgcgggtattactgacattg  
FA1090 ...'empty'..TgCCGTCTGaAACCTCaaaaacaaaggaaaccgaat**atg**accatcatcgtaacagggcggcgccggtttatcggcagcaacatcgtaaaagccctCaaCcaacgcggCattacGacatCg

Recombinational Joints. Uppercase letter indicate differences in sequence from the first line of sequence. In bold is the initiation or termination codon of the MME flanking gene. Underlined is the initiation or termination codon of CDSs within the MME. Those that are not within the span of sequence shown are indicated by the number of bp to the initiation or termination codon. MMEs that are 'empty' are indicated.
