# Supplementary material for: The Repertoire of Minimal Mobile Elements in the Neisseria Species and Evidence That These Are Involved in Horizontal Gene Transfer in Other Bacteria
Source: Oxford University Press journal article supplement (doi:10.1093/molbev/msm215), 2007-06-29
Supplement: msm215_Supplementary_Data.zip [file msm215_Supplementary_Data.zip › mbe-07-0447-File015_msm215.pdf]

Supplementary Material. Oligonucleotide primers used.

| MME          | Primer 1            | Primer 2             |
|--------------|---------------------|----------------------|
| MMErpoCrpsL  | caccgacagcttcatttc  | gacttcaaaaccgttggtc  |
| MMEvalSlysR  | agcttcacggggtaagtt  | cgcctgatgctgaaagtc   |
| MMEdadAvalS  | gaaaccttggtttggtc   | cagttggatggaaaaagacg |
| MMEfabZlpxA  | caaacgccaagtcattcc  | ctcgtcgcggtattttt    |
| MMEfrr       | cgaacacctccactacca  | ccccagtattcgacttcc   |
| MMEnuoG      | agttgcgatgcagtagga  | ccgtcgatttcgatttg    |
| MMEnuoIJ     | accaagtgcattcttctgc | aatacggctgccccaat    |
| MMEnuoKL     | ctcctgttcggtatcagc  | tgaagaagcgttggtagc   |
| MMEnuoLM     | ctatggtgttcggcgat   | cggacgtttctgaatgac   |
| MMEpdxJapS   | ggacacggactgaccata  | cttgttctccagccatt    |
| MMEamiC      | gtgcgccttgaggaagt   | cgtctatcctggtcgaaa   |
| MMESMC       | caactcggaaacttcgtc  | gtcgggtcggtaaaagat   |
| MMEgcvTH     | gcgcatatggaagtgttg  | gcggctttacagactca    |
| MMEksgA      | gatgattgcaggcagtc   | cttcgcggattttgttc    |
| MMErpoH      | gagccgacaactatcgaa  | ctgctcatgtcgttctcc   |
| MMENMB0775-6 | accatgccgtctgaaat   | caacaggtcagctttgct   |
| MMErfaED     | gccatgtaccttgccaat  | cgtcgtggttcacgtat    |
| MMEldl       | gcctgcgtaatacacaatc | cccaacacttcaaacagc   |
| MMEtrpEpurK  | atgggggtttcaacaacg  | tcggcattgacgttttc    |
| MMEaspA      | gtcatcgccaatgtatg   | ggtttttccggtatga     |
| MMEleuDB     | gggcattggacgactac   | actgcaccaagcaggac    |
| MMEglyAdeda  | gaaagccacgttttctc   | atccacacaccgtattgc   |
| MMEglnDguaB  | tttatccacggacacacc  | ggggaggttgagtgtgat   |
| MMEzurcobW   | gcggtcaacggctatatt  | tcgagttgtcgcttttg    |
| MMEnrdaB     | tgcttatgaaacctgtg   | gggaaaggtgctgtatga   |
| MMEuvrB      | gggaagaatatgcacage  | gcgtgtaccacgaagaag   |
| MMEpdhBlpdA  | gaacggcttggttggtc   | gggtatttgataccgttg   |
| MMEfmu       | atgaaggccgtctgaaa   | cttcttcatcaagcaggtct |
| MMErbfAtruB  | acggaagaagtgtgga    | gtctgaaattcggttaagg  |
| MMErifSU     | catgaccaccgaagaaga  | taatcaggctggacgaag   |
| MMEfprdinP   | gatggcgaaagtgatgag  | caagataggcttcgtcca   |
| MMEhesA      | atgctcgttaccgcttc   | aatacccatgcgacagtg   |
| MMEasmAfolP  | atatacgggaagcgtgcag | gccgatgtcgagaatgt    |
| MMEgrx       | gcagatgttcgtctgactg | gcgagagtttgacattg    |
| MMEglyQS     | cgcagttcaacgactac   | gtagctgtcggcggtttt   |
| MMEpurLhagH  | attctgaacgaaatgcaag | gttgcccaaacggtaac    |
| MMEhagHmgtE  | gaatccgacatcgaaagc  | gtcggatacttccagcaa   |
| MMEmetRrpsI  | tggacagtcatgccctac  | gtggctcgtgtattcctg   |
| MMEobgcysS   | acgcaggaattggtacac  | atgtcgaacaccaccatc   |
