# Supplementary figures and images for: The Repertoire of Minimal Mobile Elements in the Neisseria Species and Evidence That These Are Involved in Horizontal Gene Transfer in Other Bacteria
Source: Oxford University Press journal article supplement (doi:10.1093/molbev/msm215), 2007-06-29

SIMILARITY SCALE

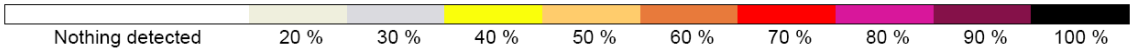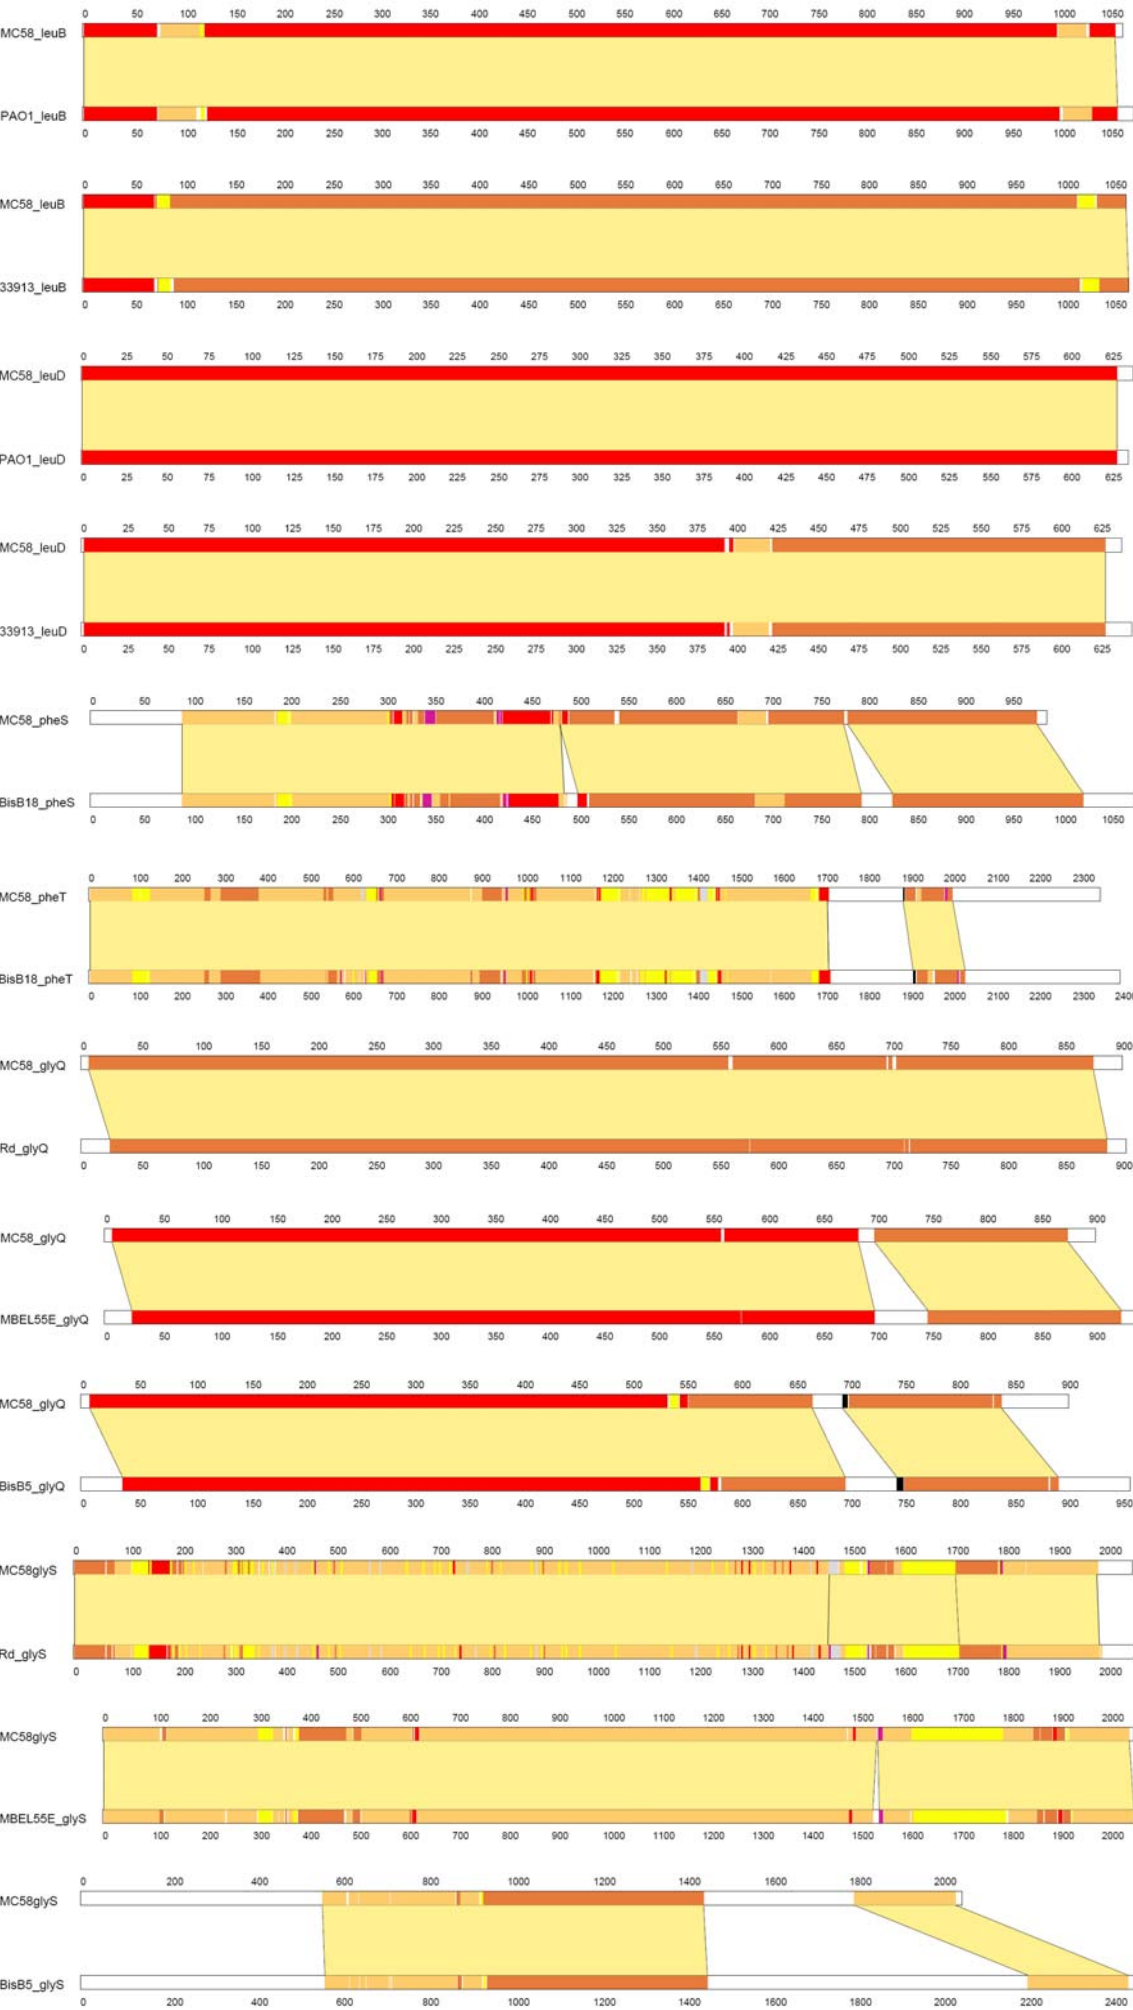

Supplement: msm215_Supplementary_Data.zip [file msm215_Supplementary_Data.zip › mbe-07-0447-File013_msm215.pdf]
